# Supplementary material
Source: bioRxiv or medRxiv preprint supplement (https://www.biorxiv.org/highwire/filestream/117190/field_highwire_adjunct_files/0/371260-1.pdf)
Supplement: Supplementary file [file 371260-1.pdf]

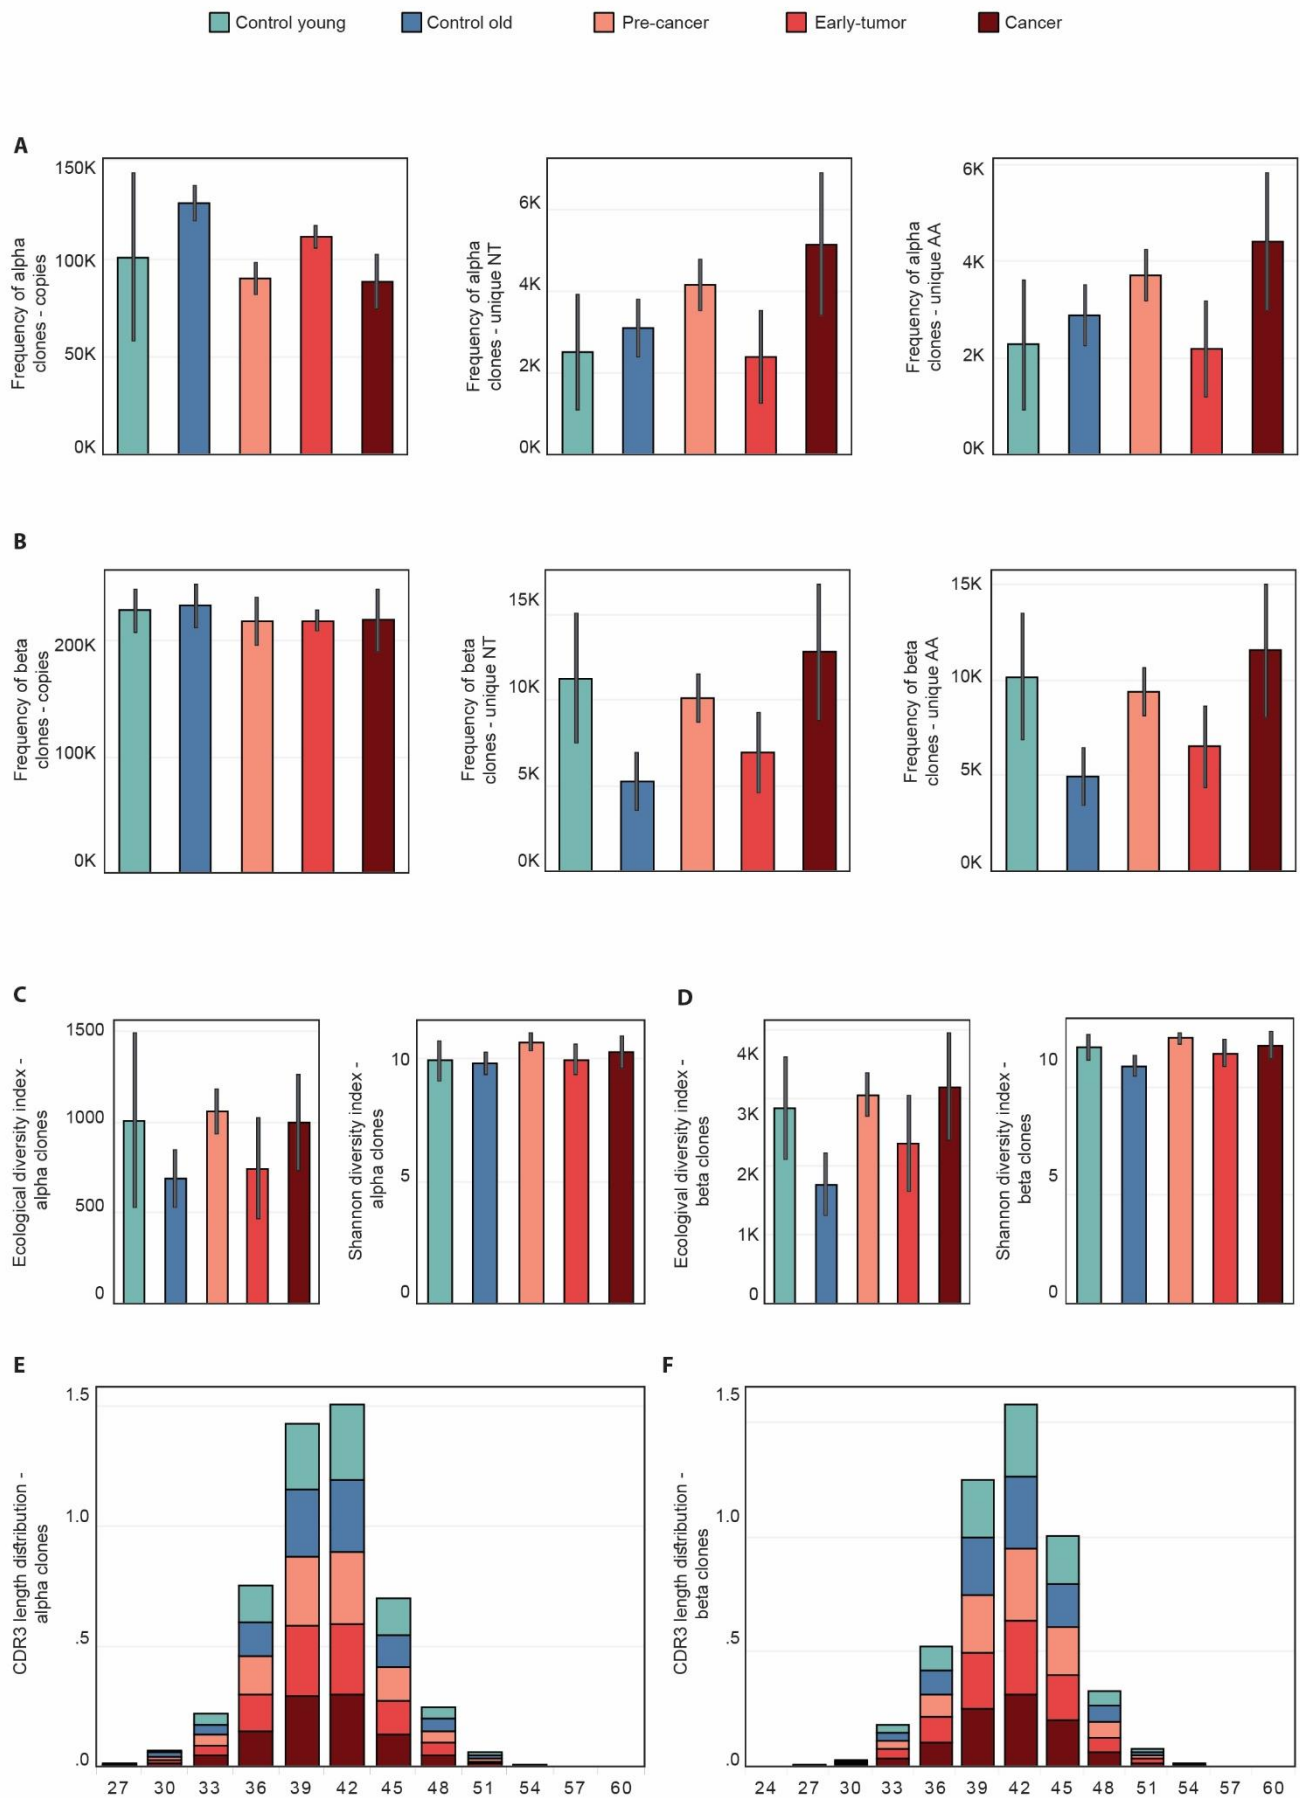

**Fig. S1. Diversity measures and CDR3 length distribution.**

(A, B) The number of unique sequences and their copies for the 5 different group (Control-young, control-old, no-cancer, pre-cancer and cancer) in alpha (a) and beta (b) chains. (C, D) Shannon entropy and ecological diversity measures of the different groups. (E, F) CDR3 length distribution of the different groups in alpha and beta chains.

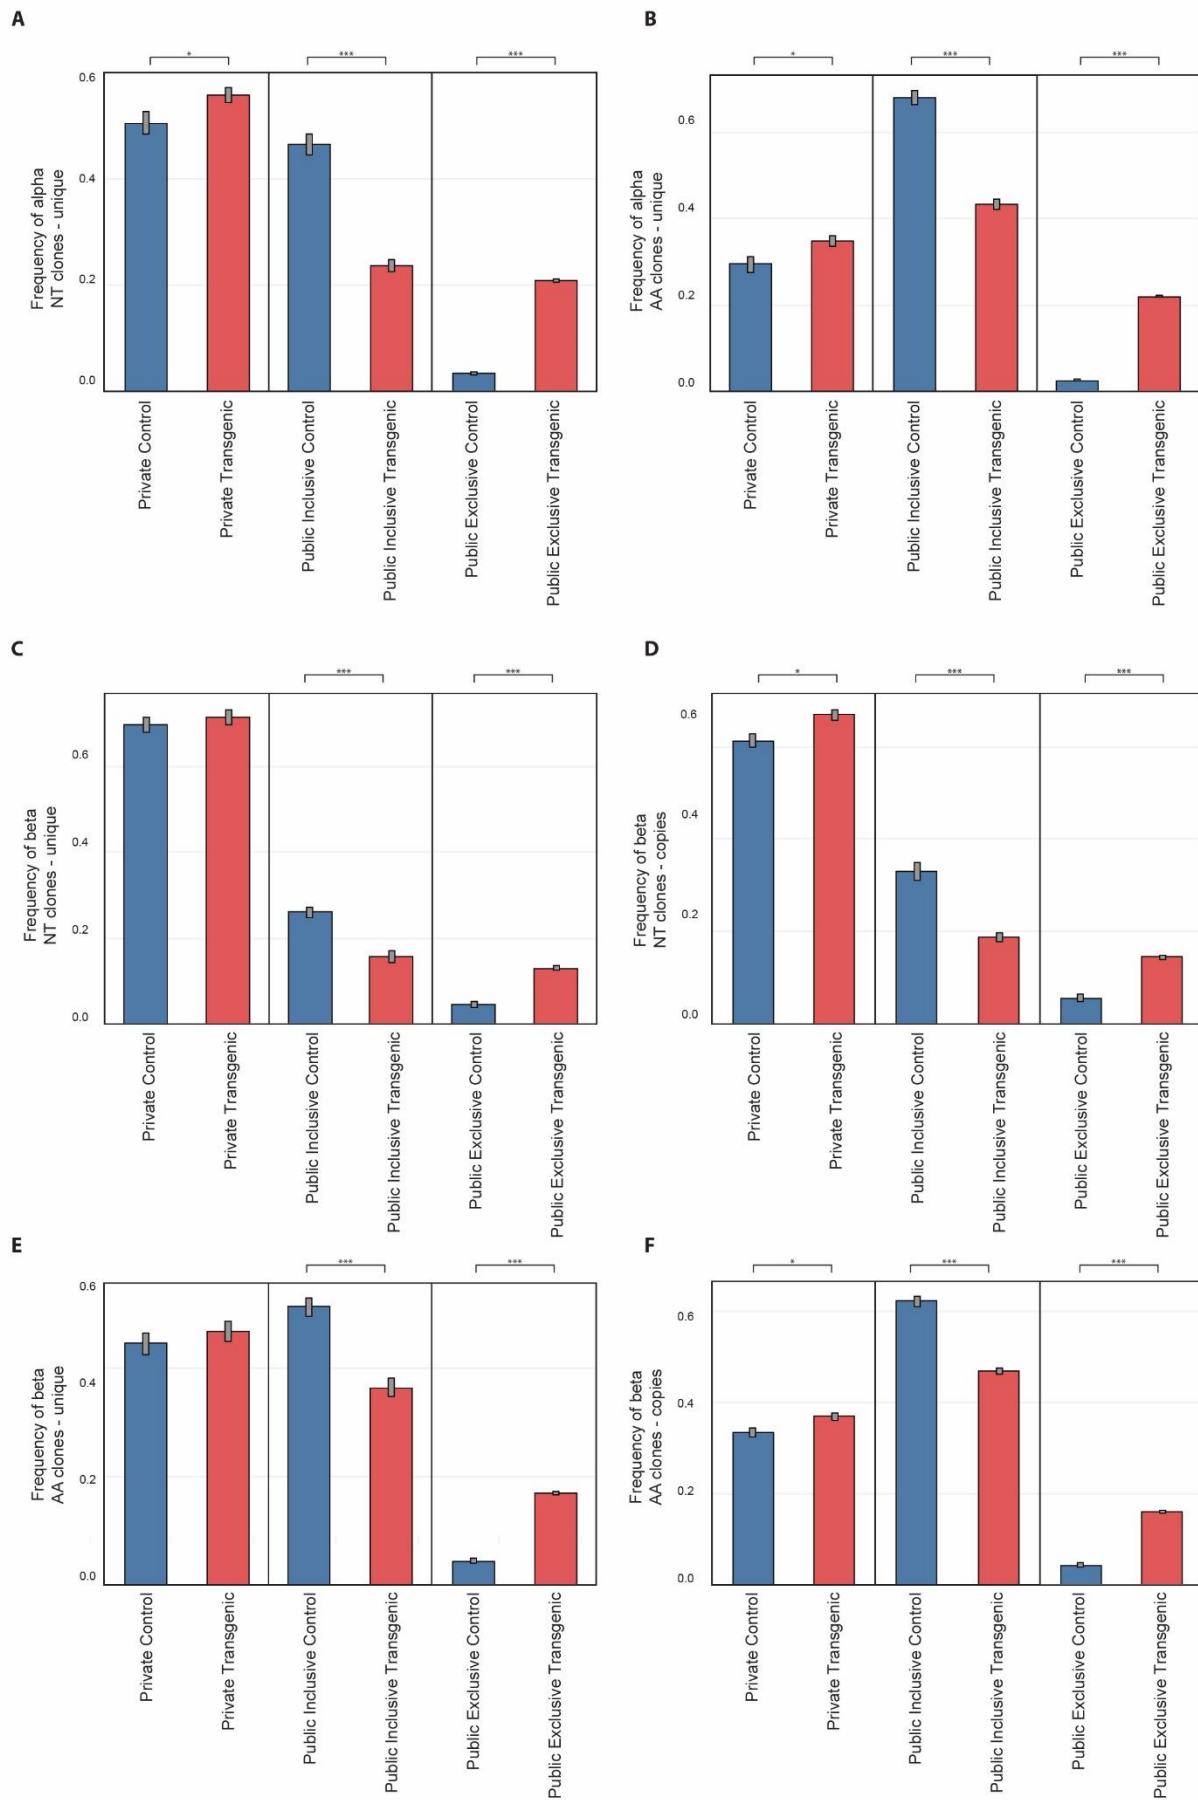

**Fig. S2. Public repertoires.** (A-F) The ratios of private, inclusive-public and exclusive-public repertoires in alpha unique NT clones (A) and AA clones (B), beta unique NT clones (C) and copies (D) and beta unique AA clones (E) and copies (F).

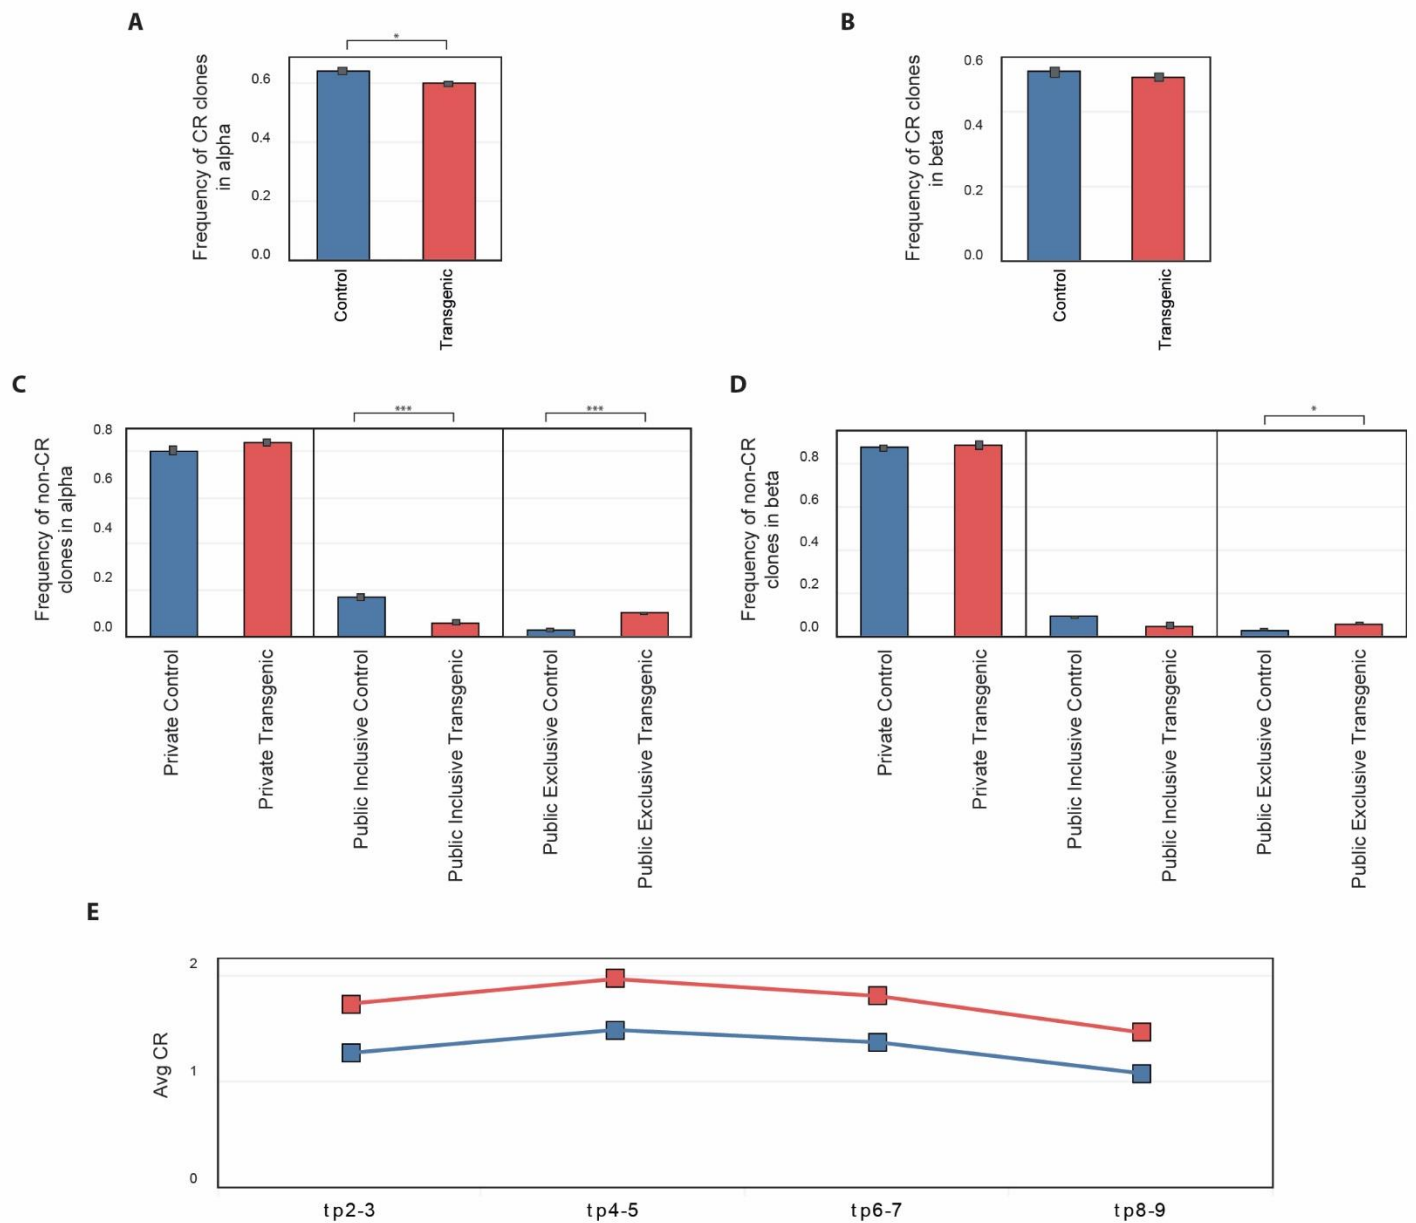

**Fig. S3. Convergent recombination.** (A-D) Frequency of convergent recombined clones in alpha (A) and beta (B) and non-convergent recombined clones in alpha (C) and beta (D). (E) The average CR level in the Control group (blue line) and the Tg group (red line) over time.

| Sample_id | # cells | Raw reads | Alpha  |                     |                     | Beta   |                     |                     | group         |
|-----------|---------|-----------|--------|---------------------|---------------------|--------|---------------------|---------------------|---------------|
|           |         |           | Copies | Unique NT sequences | Unique AA sequences | Copies | Unique NT sequences | Unique AA sequences |               |
| A_2       | 32064   | 723712    | 85327  | 1263                | 1219                | 232198 | 3003                | 2938                | control_young |
| A_4       | 27964   | 535959    | 106943 | 3464                | 3168                | 185003 | 5476                | 5230                | control_young |
| A_7       | 106503  | 730212    | 99261  | 8816                | 7622                | 227057 | 19443               | 17787               | control_old   |
| A_9       | 29695   | 637360    | 104969 | 678                 | 671                 | 240207 | 1366                | 1346                | control_old   |
| B_3       | 126011  | 647621    | -      | -                   | -                   | 243750 | 27155               | 24013               | control_young |
| B_4       | 126711  | 581011    | -      | -                   | -                   | 226716 | 35432               | 30938               | control_young |
| B_6       | 26085   | 568208    | 86848  | 1246                | 1215                | 172698 | 2339                | 2304                | control_old   |
| B_8       | 59652   | 576945    | 80271  | 2384                | 2246                | 200162 | 5186                | 5009                | control_old   |
| C_2       | 123170  | 651732    | 66430  | 753                 | 736                 | 212338 | 2083                | 2059                | control_young |
| C_4       | 86484   | 746969    | -      | -                   | -                   | 271564 | 27814               | 24538               | control_young |
| C_5       | 103905  | 923329    | 385040 | 11272               | 10516               | 385040 | 11272               | 10516               | control_young |
| C_6       | 22735   | 802049    | 116365 | 989                 | 972                 | 230074 | 1841                | 1814                | control_old   |
| C_7       | 83428   | 346810    | 46161  | 2534                | 2369                | 116751 | 6213                | 5907                | control_old   |
| C_8       | 15584   | 1017191   | 85478  | 284                 | 282                 | 275614 | 641                 | 637                 | control_old   |
| C_9       | 15584   | 523715    | 89757  | 658                 | 650                 | 171295 | 1144                | 1136                | control_old   |
| D_2       | 128461  | 421400    | -      | -                   | -                   | 149785 | 2376                | 2338                | control_young |
| D_4       | 79088   | 543240    | 95016  | 2346                | 2187                | 218530 | 4631                | 4481                | control_young |
| D_5       | 10182   | 600106    | 68041  | 201                 | 200                 | 174093 | 528                 | 525                 | control_young |
| D_6       | 43027   | 830358    | 130438 | 1975                | 1887                | 272778 | 4015                | 3895                | control_old   |
| D_7       | 96447   | 1083692   | 171337 | 10396               | 8842                | 340475 | 19975               | 18157               | control_old   |
| D_8       | 11906   | 581158    | 90907  | 768                 | 755                 | 189112 | 1462                | 1446                | control_old   |
| E_4       | 39288   | 507655    | 90476  | 2321                | 2162                | 189405 | 4270                | 4118                | control_young |
| E_6       | 36585   | 1073086   | 154155 | 2080                | 1998                | 379892 | 4435                | 4333                | control_old   |
| E_8       | 13602   | 543944    | 87329  | 1251                | 1215                | 201248 | 2532                | 2491                | control_old   |
| E_9       | 116084  | 583740    | 67526  | 1043                | 1011                | 206646 | 2960                | 2908                | control_old   |
| F_2       | 46966   | 475816    | 59923  | 2903                | 2668                | 169413 | 7058                | 6683                | no_cancer     |
| F_3       | 46966   | 2312834   | 231515 | 879                 | 865                 | 756883 | 2683                | 2643                | no_cancer     |
| F_4       | 131442  | 528731    | 40967  | 5596                | 4986                | 208806 | 18533               | 16913               | no_cancer     |
| F_5       | 129099  | 692292    | 120926 | 7963                | 6973                | 225972 | 14483               | 13458               | pre_cancer    |
| F_7       | 216697  | 739307    | 120341 | 9164                | 7901                | 273558 | 19190               | 17526               | cancer        |
| G_2       | 17043   | 484586    | 64057  | 938                 | 910                 | 139881 | 2002                | 1964                | no_cancer     |
| G_3       | 83739   | 490738    | -      | -                   | -                   | 173201 | 12197               | 11246               | no_cancer     |
| G_5       | 144398  | 595335    | -      | -                   | -                   | 169581 | 9030                | 8540                | pre_cancer    |
| G_6       | 69022   | 799409    | 80974  | 932                 | 918                 | 183392 | 2090                | 2065                | cancer        |
| G_7       | 79109   | 816287    | 104596 | 17011               | 13780               | 249379 | 39320               | 34222               | cancer        |
| H_2       | 38453   | 567175    | 79845  | 4369                | 3935                | 195858 | 8722                | 8192                | no_cancer     |
| H_3       | 50269   | 524514    | 99457  | 4787                | 4254                | 198872 | 8423                | 7903                | no_cancer     |
| H_4       | 124606  | 447490    | 83153  | 5941                | 5237                | 168351 | 10852               | 10048               | no_cancer     |
| H_6       | 7034    | 949643    | 134941 | 355                 | 354                 | 234373 | 653                 | 649                 | pre_cancer    |
| H_7       | 10176   | 495208    | 76313  | 317                 | 316                 | 154007 | 626                 | 623                 | cancer        |
| H_8       | 152151  | 544731    | 75481  | 6329                | 5622                | 184779 | 14986               | 13808               | cancer        |
| I_4       | 193660  | 300981    | 49950  | 11832               | 9995                | 124731 | 28330               | 25162               | no_cancer     |
| I_5       | 96363   | 781927    | 134555 | 6712                | 5945                | 272228 | 12963               | 12066               | no_cancer     |
| I_6       | 28989   | 636704    | 95469  | 1581                | 1514                | 214157 | 3341                | 3256                | pre_cancer    |
| J_2       | 144614  | 572782    | 49086  | 1825                | 1710                | 145251 | 4731                | 4520                | no_cancer     |
| J_3       | 26329   | 1015608   | 148475 | 758                 | 746                 | 375973 | 1819                | 1802                | no_cancer     |
| J_4       | 91338   | 529691    | 90156  | 5491                | 4866                | 191619 | 10561               | 9851                | no_cancer     |
| J_5       | 77937   | 745616    | 140542 | 3931                | 3617                | 213861 | 6004                | 5777                | no_cancer     |
| J_6       | 45291   | 542297    | 74374  | 1912                | 1806                | 169588 | 4272                | 4147                | no_cancer     |
| J_7       | 34020   | 661602    | 109047 | 2187                | 2092                | 226989 | 4336                | 4206                | pre_cancer    |
| J_8       | 36790   | 1708688   | 212218 | 1186                | 1154                | 463049 | 2490                | 2457                | cancer        |
| J_9       | 34984   | 400204    | 64135  | 710                 | 698                 | 127169 | 1257                | 1242                | cancer        |
| K_2       | 190167  | 1437881   | 74511  | 440                 | 438                 | 148237 | 771                 | 769                 | no_cancer     |
| K_4       | 57570   | 434631    | 71424  | 1435                | 1358                | 164672 | 2998                | 2928                | no_cancer     |
| K_5       | 107631  | 416509    | 63021  | 2264                | 2157                | 128584 | 4494                | 4327                | no_cancer     |
| K_6       | 17492   | 492313    | 76982  | 1212                | 1191                | 175489 | 2954                | 2906                | cancer        |
| K_7       | 131795  | 432717    | 49687  | 1141                | 1104                | 106906 | 2403                | 2358                | cancer        |
| L_2       | 23572   | 596425    | 74605  | 9486                | 8067                | 228171 | 24582               | 21884               | no_cancer     |
| L_5       | 102133  | 696688    | 107780 | 4394                | 4022                | 231699 | 9063                | 8584                | no_cancer     |
| L_6       | 12365   | 588921    | 104142 | 1003                | 982                 | 187046 | 1731                | 1717                | pre_cancer    |
| M_2       | 42588   | 573640    | -      | -                   | -                   | 219794 | 16317               | 14823               | no_cancer     |
| M_4       | 133728  | 461569    | 80092  | 11267               | 9482                | 181396 | 24049               | 21542               | no_cancer     |
| M_6       | 16257   | 687307    | 102585 | 1257                | 1229                | 236790 | 2843                | 2803                | pre_cancer    |
| M_7       | 112515  | 778042    | -      | -                   | -                   | 255111 | 13674               | 12777               | cancer        |
| N_2       | 74616   | 720944    | 74694  | 2096                | 1968                | 209818 | 4890                | 4717                | no_cancer     |
| N_3       | 84879   | 653289    | 98991  | 3821                | 3515                | 211537 | 7791                | 7419                | no_cancer     |
| N_5       | 44765   | 556754    | 102816 | 1823                | 1746                | 177587 | 3048                | 2987                | no_cancer     |
| N_7       | 92808   | 677063    | 110246 | 8058                | 7132                | 246097 | 16984               | 15645               | cancer        |
| O_2       | 77757   | 610413    | -      | -                   | -                   | 205298 | 21875               | 19585               | no_cancer     |
| O_4       | 126723  | 558054    | 91567  | 9278                | 7878                | 220692 | 20251               | 18332               | no_cancer     |
| O_5       | 92134   | 738591    | 121411 | 5171                | 4683                | 232310 | 9479                | 8960                | no_cancer     |
| O_6       | 37852   | 735687    | 109656 | 3015                | 2817                | 228839 | 5863                | 5653                | no_cancer     |
| O_7       | 124562  | 705997    | -      | -                   | -                   | 242723 | 19064               | 17431               | pre_cancer    |
| O_8       | 195153  | 527388    | 74832  | 15493               | 12691               | 196024 | 37787               | 32846               | cancer        |

**Table S1.** The final count of productive libraries and their count of TCR  $\alpha$  and  $\beta$  sequences.
